# Supplementary material for: Unveiling the dynamic processes of dietary advanced glycation end-products (dAGEs) in absorption, accumulation, and gut microbiota metabolism
Source: Royal Society of Chemistry journal article supplement (doi:10.1039/d4fo01545b), 2024-01-01
Supplement: d4fo01545b1.pdf [file d4fo01545b1.pdf]

**Unveiling the Dynamic Processes of Dietary Advanced Glycation End-  
Products (dAGEs) in Absorption, Accumulation, and Gut Microbiota  
Metabolism**

Yi Wu <sup>a, b \*</sup>, Yuqi Yang <sup>a</sup>, Yanhong Zhong <sup>a</sup>, Yongtai Wu <sup>b</sup>, Zhenhui Zhang <sup>b, c</sup>, Zichen Yan <sup>a</sup>,  
Bingxin Liu <sup>a</sup>, Wei Wang <sup>a, \*</sup>

**Supplementary Information**

<sup>a</sup> School of Biological and Chemical Engineering, Zhejiang University of Science and Technology, Hangzhou 310023, China

<sup>b</sup> School of Food Science and Engineering, Guangdong Province Key Laboratory for Green Processing of Natural Products and Product Safety, Engineering Research Center of Starch and Plant Protein Deep Processing, Ministry of Education, South China University of Technology, 381 Wushan Road, Tianhe District, Guangzhou 510640, China

<sup>c</sup> College of Food and Biological Engineering, Henan University of Animal Husbandry and Economy, Zhengzhou 450000, China

\* Corresponding author, Yi Wu, Dr., Assistant Prof. School of Biological and Chemical Engineering, Zhejiang University of Science and Technology, Hangzhou 310023, China. E-mail: mbb\_wuyi@163.com, Fax number: +86-0571-85070371

\* Corresponding author, Wei Wang, Dr., Prof. School of Biological and Chemical Engineering, Zhejiang University of Science and Technology, Hangzhou 310023, China. E-mail: wangwei5228345@126.com

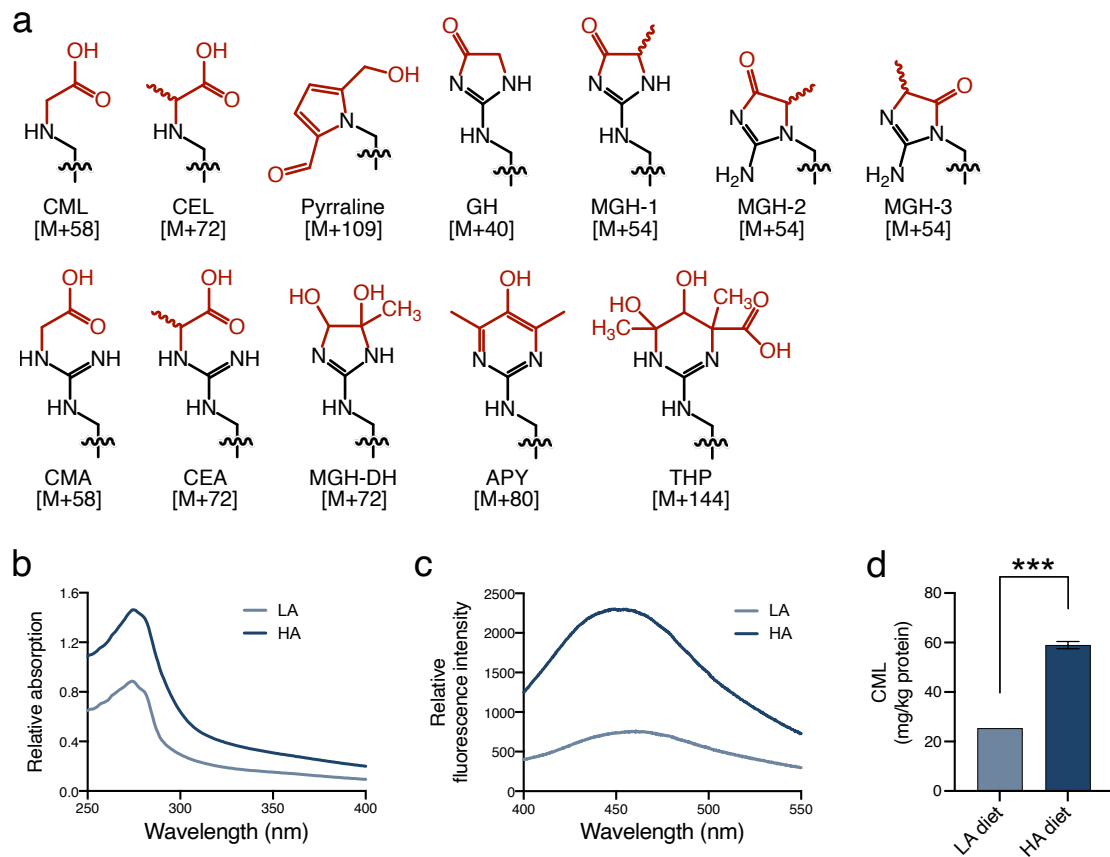

**Fig. S1. AGEs content in HA and LA diet.** a) Potential AGEs formatted in diet, including Nε-(carboxymethyl)-L-lysine (CML), Nε-(carboxyethyl)-L-lysine (CEL), formylglyoxal lysine adduct (Pyrraline), maltosine, glyoxal hydroimidazolones (GH), methylglyoxal hydroimidazolones (MGH-1-3), carboxymethylarginine (CMA), carboxyethylarginine (CEA), dihydroxyimidazolidine (MGH-DH), argpyrimidine (APY), tetrahydropyrimidine (THP) and etc. b) The UV absorption spectrum of the β-casein and glycosylated β-casein in the LA and HA diet, respectively. c) The fluorescence spectroscopy of the β-casein and glycosylated β-casein in the LA and HA diet, respectively. d) Bar plot showing CML content in the LA and HA diet. Significance determined using one-way ANOVA with Tukey post hoc analysis and expressed as mean ± SEM. \*\*\*P < 0.001.

### CM modification. E.g. Entry 2. K43 (C2O2H2)

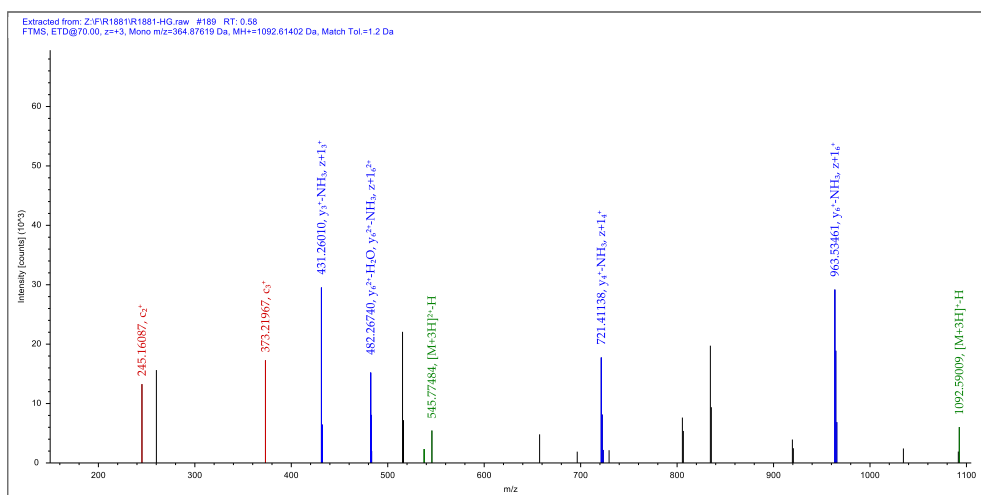

### Pyrr modification. E.g. Entry 3. K44 (C6H4O2)

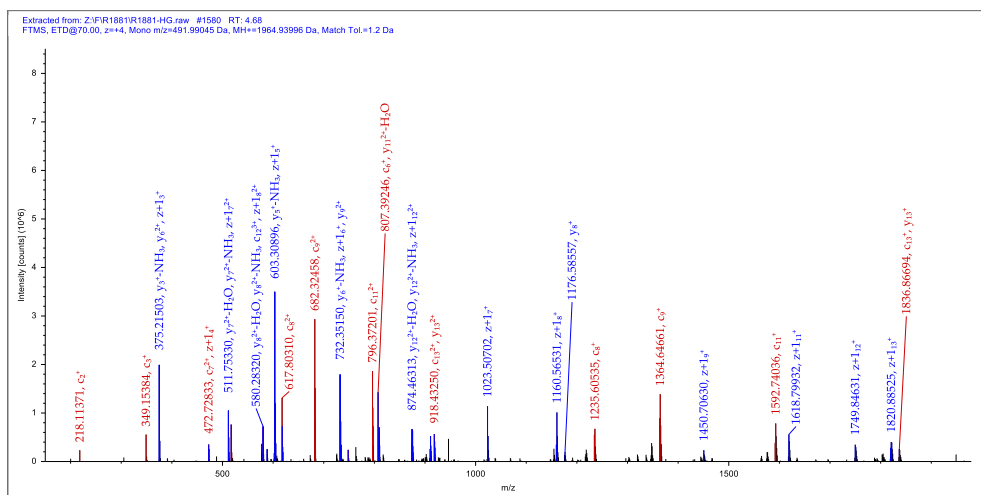

### CE modification. E.g. Entry 5. K144 (C3H4O2)

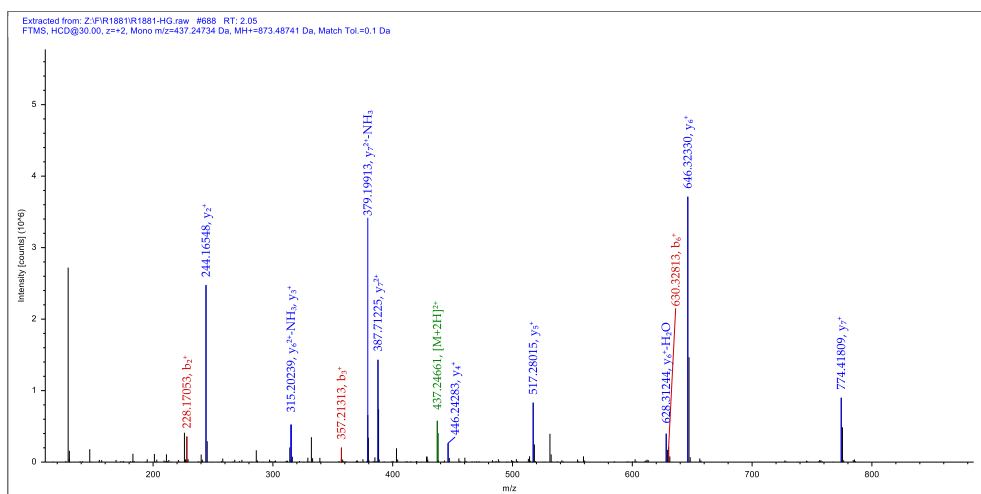

### AP modification. E.g. Entry 9. R137 (C5H4O)

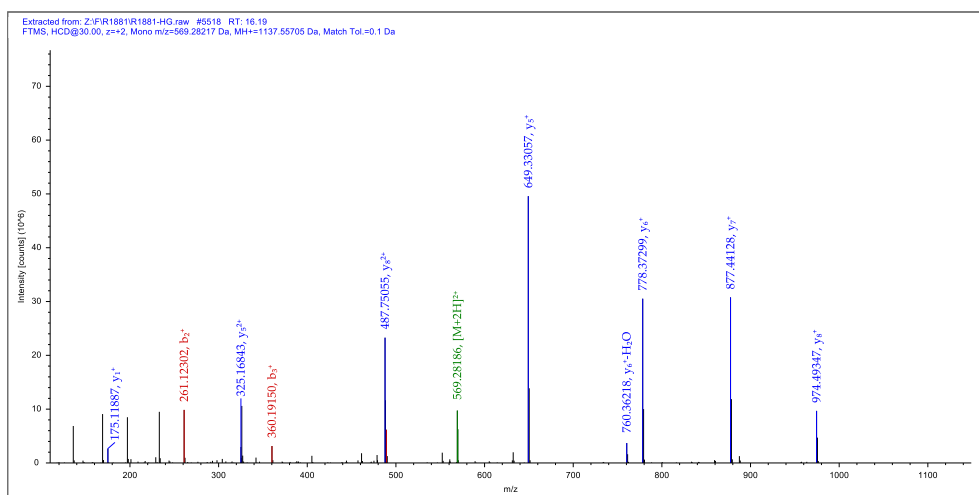

### GO modification. E.g. Entry 9. R137 (C2O)

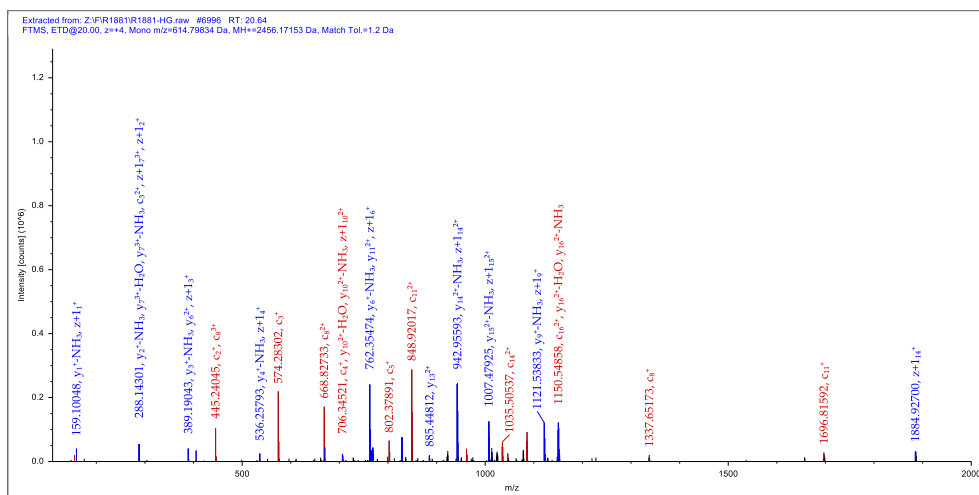

### MGO modification. E.g. Entry 11. R198 (C3H2O)

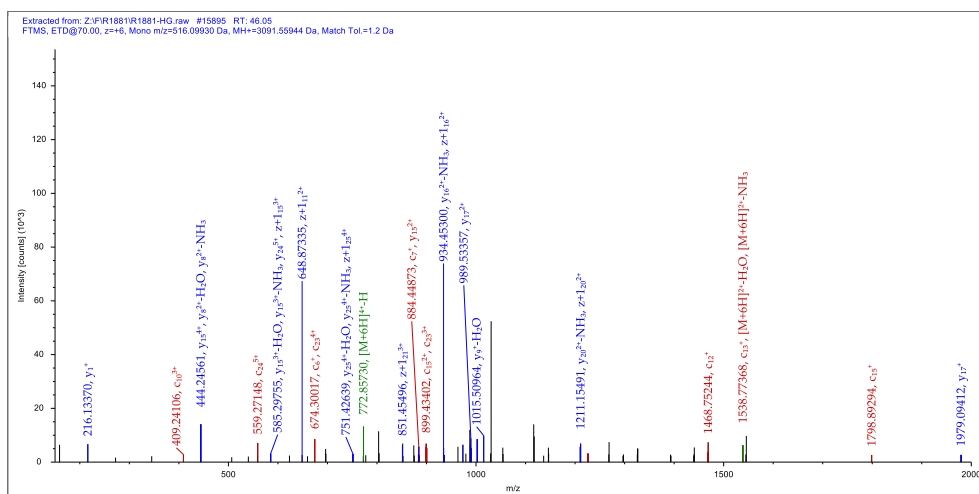

Fig. S2. The typical MS<sup>2</sup> spectrum of the modifications in peptide mapping

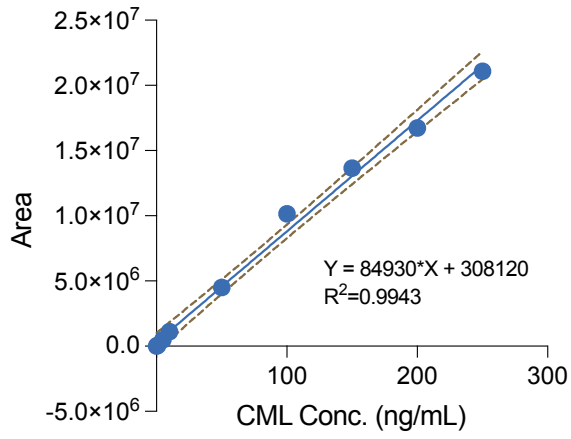

| CML Conc. (ng/mL) | Area     |
|-------------------|----------|
| 0.1               | 6.24E+02 |
| 1                 | 7.71E+04 |
| 5                 | 5.07E+05 |
| 10                | 1.10E+06 |
| 50                | 4.50E+06 |
| 100               | 1.02E+07 |
| 150               | 1.37E+07 |
| 200               | 1.67E+07 |
| 250               | 2.11E+07 |

LOD: 0.1 ng/mL

LOQ:250 ng/mL

**Fig. S3. The standard curve of CML measured by LC-MS/MS.**

CML of small intestine

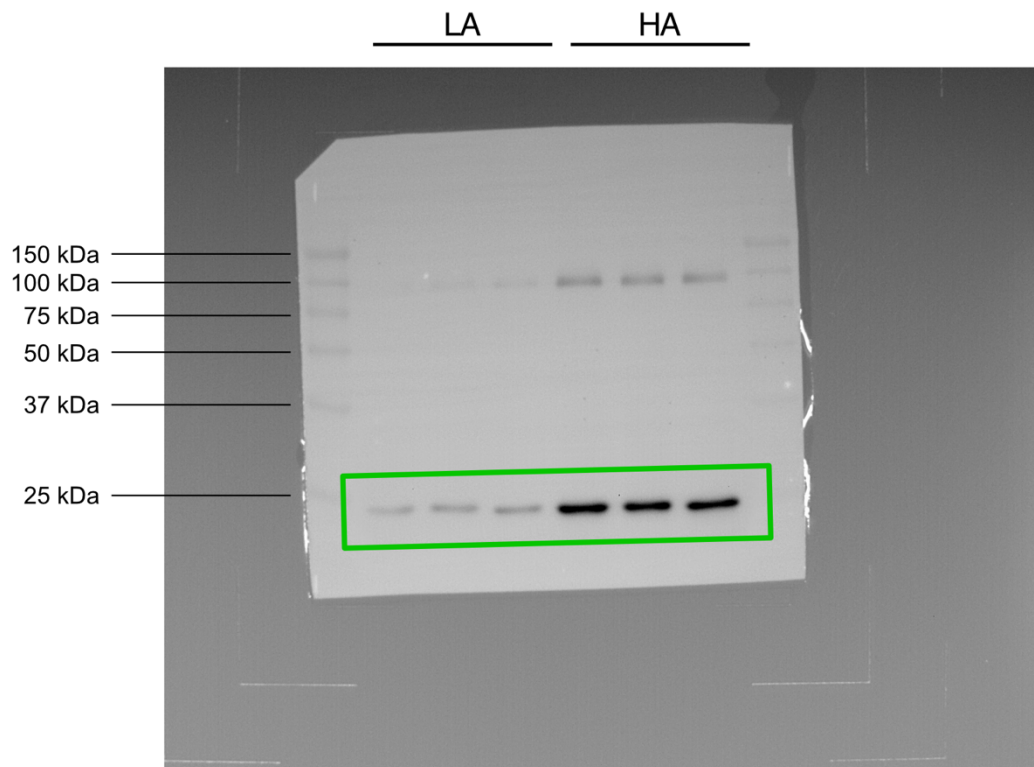

CML of colon

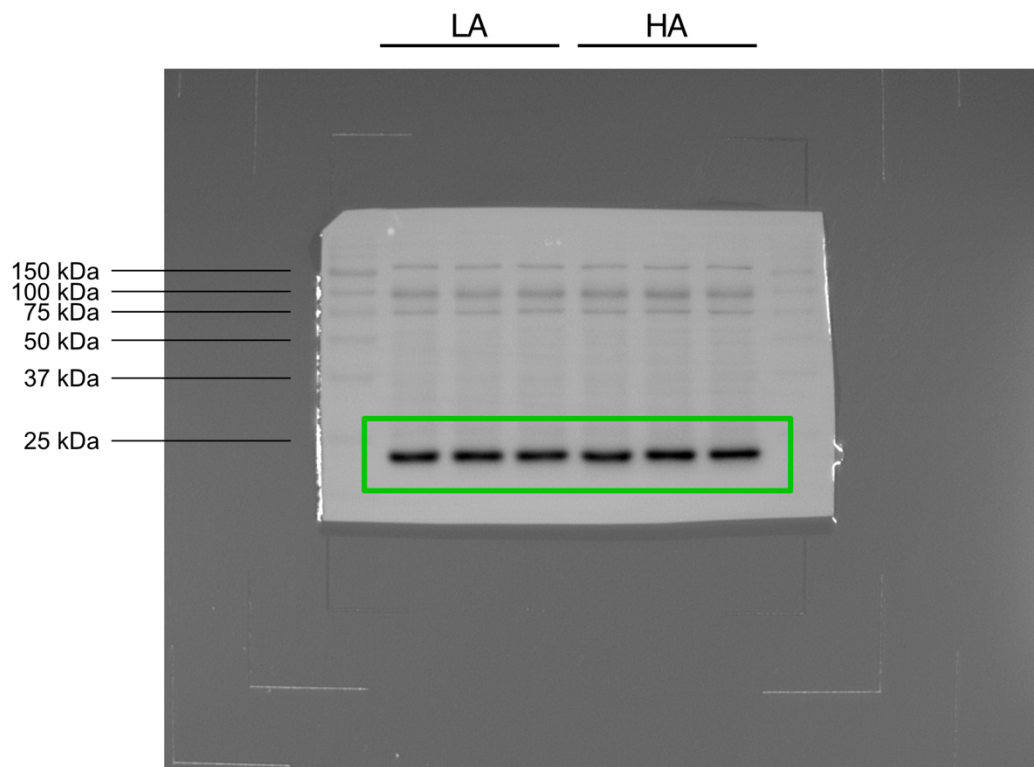

CML of liver

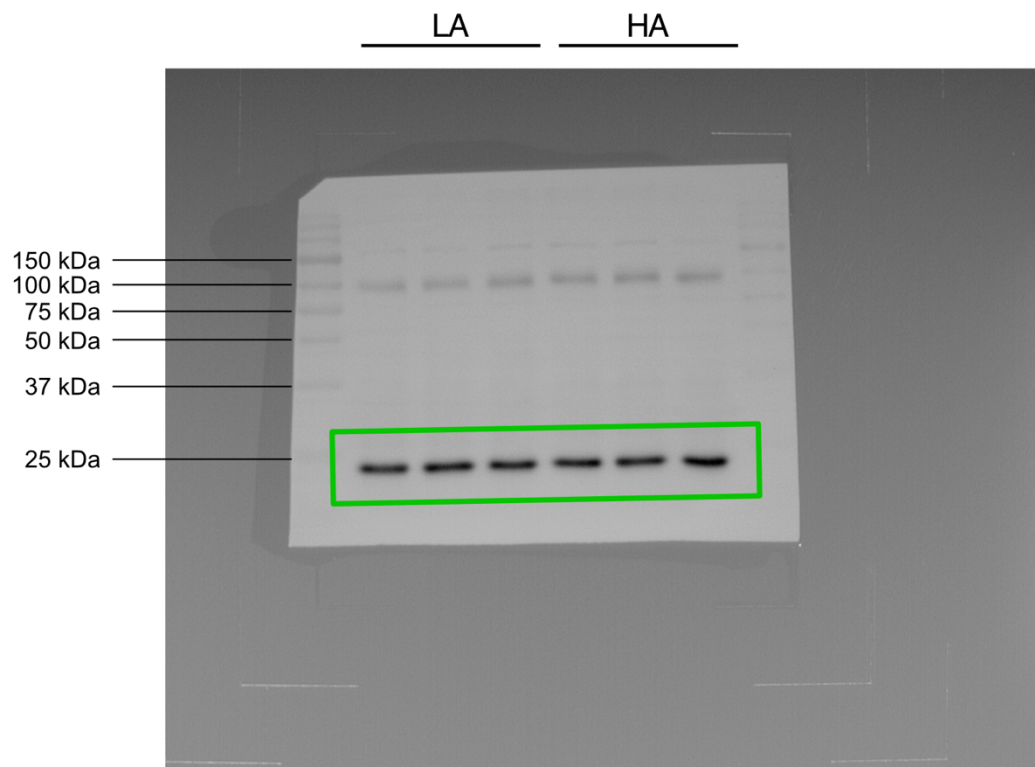

CML of kidney

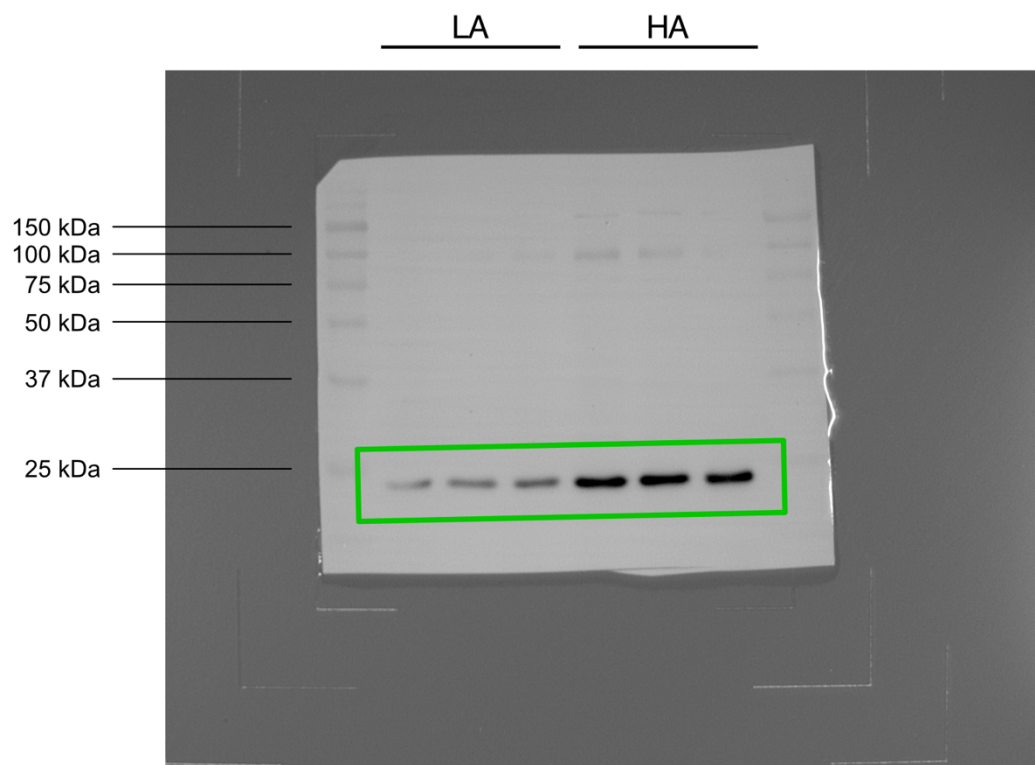

B-actin of kidney

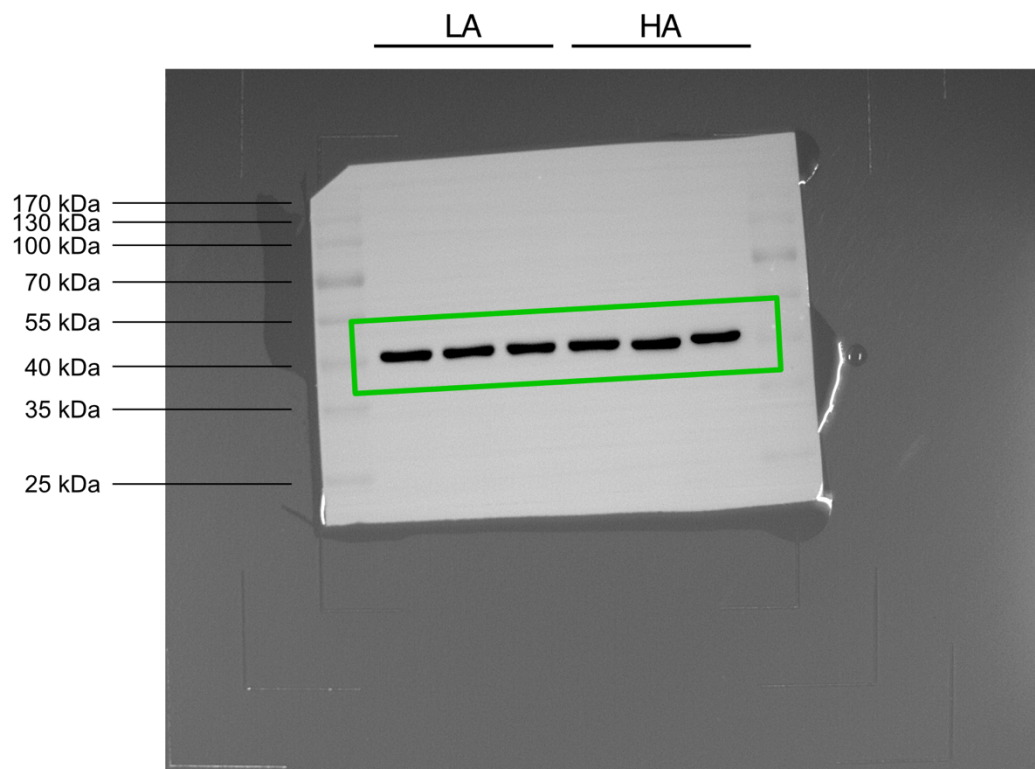

**Fig. S4. Row data of western blot.**



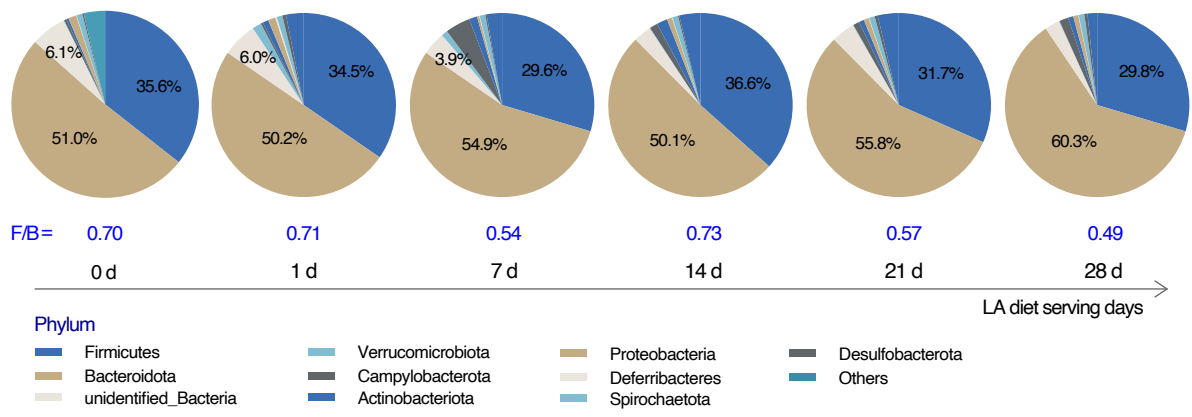

**Fig. S5. Dynamic changes in the relative abundance of microbial taxa at the phylum level of LA group.**

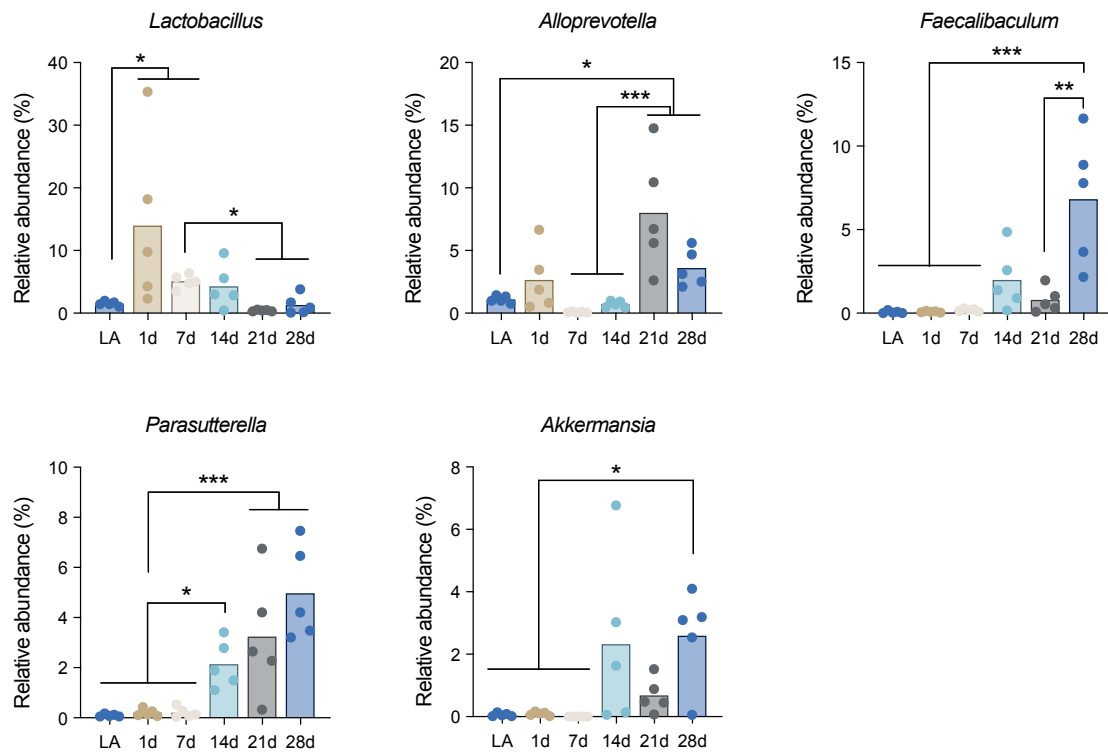

**Fig. S6. Relative abundance (%) of the genera *Lactobacillus*, *Alloprevotella*, *Faecalibaculum*, *Parasutterella*, and *Akkermansia*.** Significance determined using one-way ANOVA with Tukey post hoc analysis and expressed as mean  $\pm$  SEM. \*P < 0.05, \*\*\*P < 0.001.

## KEGG pathway annotation

### Cellular Processes

Transport and catabolism  
Cellular community – prokaryotes  
Cell growth and death  
Cell motility

### Environmental Information Processing

Signaling molecules and interaction  
Signal transduction  
Membrane transport

### Genetic Information Processing

Transcription  
Replication and repair  
Folding, sorting and degradation

### Human Diseases

Substance dependence  
Neurodegenerative diseases  
Infectious diseases  
Immune diseases  
Endocrine and metabolic diseases  
Drug resistance  
Cardiovascular diseases  
Cancers

### Metabolism

Xenobiotics biodegradation and metabolism  
Nucleotide metabolism  
Metabolism of terpenoids and polyketides  
Metabolism of other amino acids  
Metabolism of cofactors and vitamins  
Lipid metabolism  
Glycan biosynthesis and metabolism  
Enzyme families  
Energy metabolism  
Carbohydrate metabolism  
Biosynthesis of other secondary metabolites  
Amino acid metabolism

### Organismal Systems

Nervous system  
Immune system  
Excretory system  
Environmental adaptation  
Endocrine system  
Digestive system  
Circulatory system  
Aging

### Unclassified

Viral protein family  
Poorly characterized  
Metabolism  
Genetic information processing  
Cellular processes and signaling

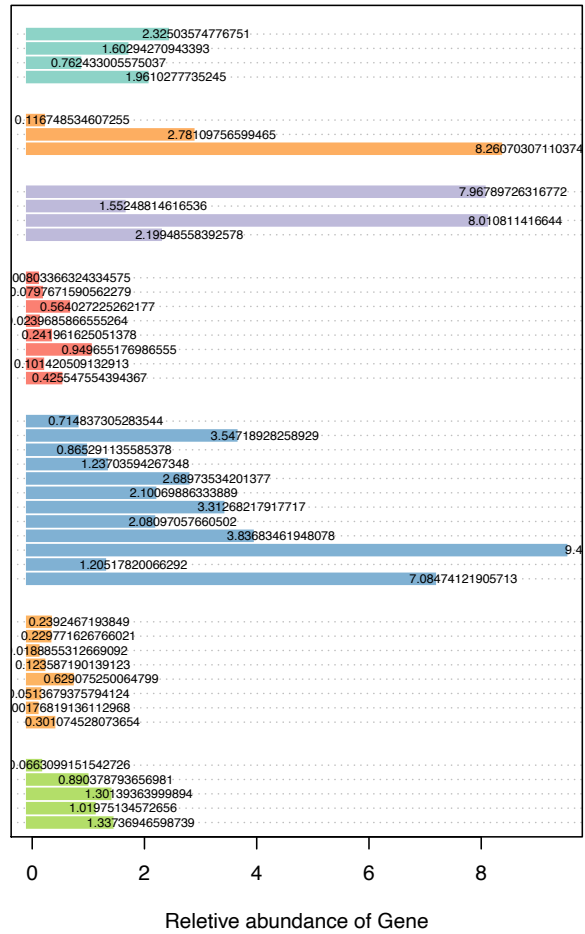

**Fig. S7. Predicting potential host functional changes resulting from differential microbiota-metabolite interactions induced by HA diet.**

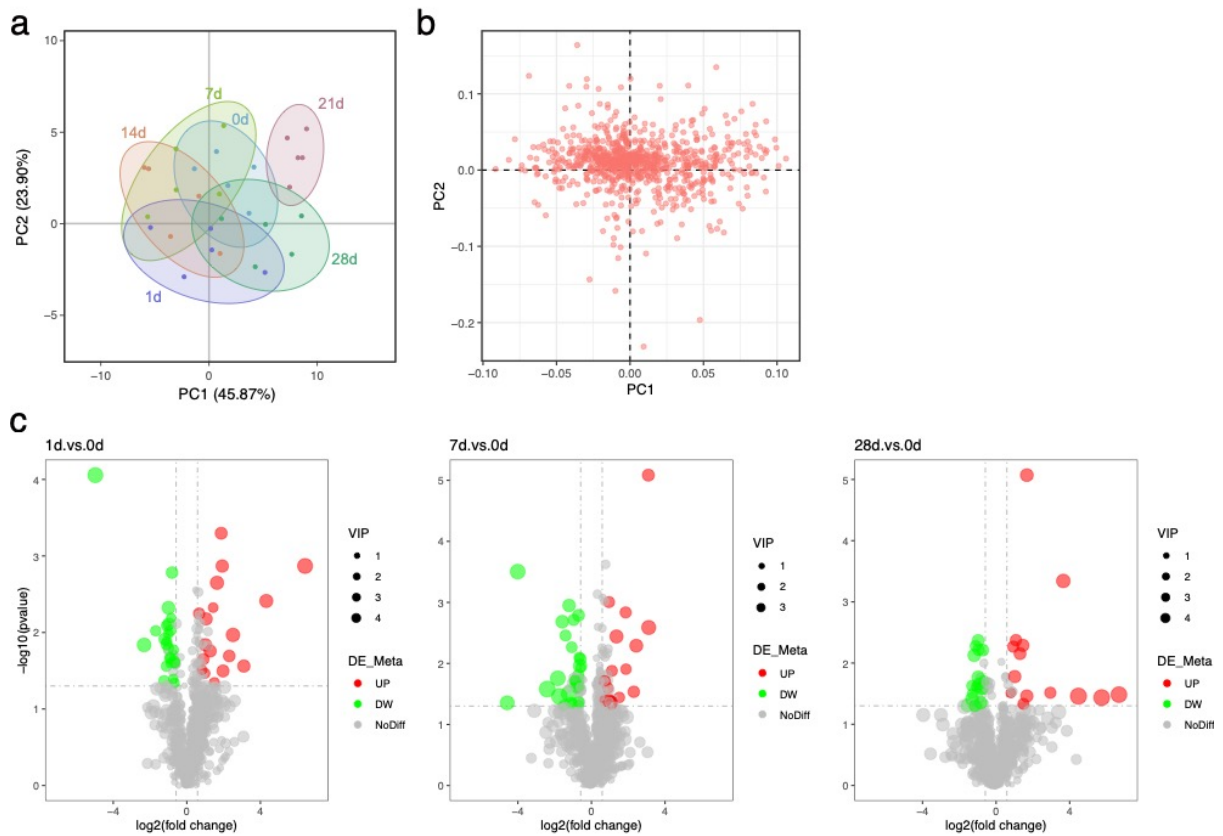

**Fig. S8. Fecal Metabolomics Changes with Varied LA Diet Intake Periods.** a) Principal component analysis (PCA) plot comparing the effects of the LA diet intake periods on fecal metabolite distribution. b) Metabolites that significantly change in the same direction (blue) or opposite direction (red) at LA diet intake days 7 and 28 compared to 0 d are plotted as loading coefficients, as they contribute to PLSR scores of the fecal metabolome. Each metabolite is represented by a dot. c) Volcano plot depicting the significance of differences between fecal metabolomes of LA diet intake days 1, 7, and 28 compared to 0 d.

**Table S1. Composition of the experimental diets.**

| Component                               | Unit calorific value<br>(kcal/g) | LA<br>(g/kg) | Calories<br>(kcal) | <sup>13</sup> C-HA<br>(g/kg) | Calories<br>(kcal) | HA<br>(g/kg) | Calories<br>(kcal) |
|-----------------------------------------|----------------------------------|--------------|--------------------|------------------------------|--------------------|--------------|--------------------|
| Soyabean oil                            | 9                                | 100          | 900                | 100                          | 900                | 100          | 900                |
| Casein                                  | 4                                | 200          | 800                |                              |                    |              |                    |
| <sup>13</sup> C-labeled glycated casein | 4                                |              |                    | 200                          | 800                |              |                    |
| Glycated casein                         | 4                                |              |                    |                              |                    | 200          | 800                |
| Methionine                              | 4                                | 3            | 12                 | 3                            | 12                 | 3            | 12                 |
| Maize starch                            | 4                                | 630          | 2520               | 630                          | 2520               | 630          | 2520               |
| Salt mixture*                           | 1.6                              | 35           | 56                 | 35                           | 56                 | 35           | 56                 |
| Vitamin mixture†                        | 3.9                              | 10           | 39                 | 10                           | 39                 | 10           | 39                 |
| Methyl cellulose                        | 0                                | 31           | 0                  | 31                           | 0                  | 31           | 0                  |
| Choline chloride                        | 0                                | 1            | 0                  | 1                            | 0                  | 1            | 0                  |
| Total                                   |                                  | 1010         | 4327               | 1010                         | 4327               | 1010         | 4327               |

LA, low-AGEs diet; HA, high-AGEs diet.

\* The salt mixture contained the following (mg/g): calcium phosphate diabasic, 500; sodium chloride, 74; potassium sulfate, 52; potassium citrate monohydrate, 20; magnesium oxide, 24; manganese carbonate, 3.5; ferric citrate, 6; zinc carbonate, 1.6; cupric carbonate, 0.3; potassium iodate, 0.01; sodium selenite, 0.01; chromium potassium sulfate, 0.55.

† The vitamin mixture contained the following (mg/g): thiamin hydrochloride, 0.6; riboflavin, 0.6; pyridoxine hydrochloride, 0.7; nicotinic acid, 3; calcium pantothenate, 1.6; D-biotin, 0.05; cyanocobalamin, 0.001; retinyl palmitate, 1.6; DL- $\alpha$ -tocopheryl acetate, 20; cholecalciferol, 0.25; menaquinone, 0.005.

**Table S2. AGE modifications in  $\beta$ -casein measured by peptide mapping.**

| Site | Entry | 11-mer Sequence | LA                 | ( <sup>13</sup> C-) HA |
|------|-------|-----------------|--------------------|------------------------|
| R40  | 1     | EESITRINKKI     |                    | CM; MG-H               |
| K43  | 2     | ITRINKKIEKF     | <b>CM</b>          | <b>CM</b> ; CE         |
| K44  | 3     | TRINKKIEKFQ     | CE                 | <b>CM</b> ; Pyrr       |
| K47  | 4     | NKKIEKFQSEE     | CE                 | CE; Pyrr               |
| K114 | 5     | GVSKVKEAMAP     |                    | <b>CM</b> ; CE         |
| K120 | 6     | EAMAPKHKEMP     | <b>CM</b> ; CE     | <b>CM</b> ; CE         |
| K122 | 7     | MAPKHKEMPPF     | <b>CM</b> ; CE     | <b>CM</b> ; CE         |
| K128 | 8     | EMPPFKYPVEP     | <b>CM</b> ; CE     | CE                     |
| R137 | 9     | EPFTERQSLTL     | CE; GO-H; MG-H; AP | CE; GO-H; AP           |
| K191 | 10    | LPVPQKAVPYP     | <b>CM</b> ; CE     | <b>CM</b>              |
| R198 | 11    | VPYPQRDMPIQ     | CM; CE; GO-H; AP   | CM; CE; GO-H; MG-H     |

Carboxymethylation (CM), carboxyethylation (CE), pyrrolization (Pyrr), arginine derived pyrimidine (AP), glyoxal derived hydroimidazolone (GO-H), and methylglyoxal derived hydroimidazolone (MG-H). Modifications that form CML are shown in bold.

## Supplementary Methods

### Orbitrap-MS/MS-Based Peptide Mapping.

Glycation sites of Two types of glycated casein were analyzed using a proteomics method described by Sjoblom et al. <sup>1</sup> with some modifications. Briefly, protein samples were treated by DTT, followed by hydrolyzed by sequencing grade modified trypsin (Sigma-Aldrich, USA). The Ultimate 3000 RSLC nanosystem (Thermo Scientific, USA) was connected to an AdvanceBio Peptide column (2.7  $\mu$ m, 2.1 x 150 mm, Agilent, USA). Orbitrap Fusion (Thermo Scientific, USA) was used to detect the MS/MS of the peptide at the mode of positive ion. Fragmentation energy was applied at a slope of 3.6 V/100 Da and -4.8 V offset, and at a slope of 3.0 V/100 Da and 2 V offset. Analysis was completed using Proteome Discover 1.4 software as follows: carboxymethylation (Lys and Arg, C<sub>2</sub>H<sub>2</sub>O<sub>2</sub>), carboxyethylation (Lys and Arg, C<sub>3</sub>H<sub>4</sub>O<sub>2</sub>), pyrrolization (Lys, C<sub>6</sub>H<sub>4</sub>O<sub>2</sub>), furanization (Lys and Arg, C<sub>6</sub>H<sub>4</sub>O<sub>2</sub>), arginine derived pyrimidine (Arg, C<sub>5</sub>H<sub>4</sub>O), glyoxal derived hydroimidazolone (Arg, C<sub>2</sub>O), and methylglyoxal derived hydroimidazolone (Arg, C<sub>3</sub>H<sub>2</sub>O) were set as variable modification.

## Reference

1. N. M. Sjoblom, M. M. G. Kelsey and R. A. Scheck, A Systematic Study of Selective Protein Glycation, *Angew Chem Int Ed Engl*, 2018, **57**, 16077-16082.
